# Supplementary material for: Short screening tools for risky drinking in Aboriginal and Torres Strait Islander Australians: modified AUDIT-C and a new approach
Source: Springer Nature journal article supplement (doi:10.1186/s13722-019-0152-6), 2019-07-01
Supplement: MOESM1 [file 16869996]

# Short screening tools for risky drinking in Aboriginal and Torres Strait Islander Australians: modified AUDIT-C and a new approach: results

## Overview

This document presents the results used in the production of this paper. Please note the dataset is highly sensitive as it was collected from small Aboriginal communities. As such, due to ethical restrictions, it is withheld.

## Set-up

### libraries and sources

#### A note on packages

Please note that ‘papertools’ version 0.4.3.1 was used in formatting these results. This package was developed by one of the authors and is available open-source on github: <https://github.com/JConigrave>

To install and inspect the specific version used in this report, please run the following code:

```
devtools::install_github("JConigrave/papertools@0.4.3.1").
```

### Load libraries and data

```
library(tidyverse)

## -- Attaching packages ----- tidyverse 1.2.1 --
## v ggplot2 3.1.0      v purrr   0.3.2
## v tibble  2.1.1      v dplyr   0.8.0.1
## v tidyr   0.8.3      v stringr 1.4.0
## v readr   1.3.1      v forcats 0.4.0

## -- Conflicts ----- tidyverse_conflicts() --
## x dplyr::filter() masks stats::filter()
## x dplyr::lag()    masks stats::lag()

levels = c("Never", "Once in a blue moon (<1/month)", "Sometimes (1-3 times/month)", "A few times a week (3-4 times/week)", "Most days or every day")

f = readRDS("grog_app_complete.RDS") %>%
  filter(drinker_a == 1) %>%
  mutate(dependence_boss_a = factor(dependence_boss_a, levels = levels),
         dependence_time_a = factor(dependence_time_a, levels = levels))
tr = f[f$sd_a == 0,] #separate cases where there was no variance in drinking.
```

## function for median and IQRs

```
m_iqr = function(x,round =2){
  med = round(median(x , na.rm=T),round)
  iqr = round(IQR(x, na.rm=T), round)
  return(paste0(med," (",iqr,")")
}
```

## function to obtain sessions for individuals (FINNISH METHOD)

```
getSessions = function(i,
  type = "a",
  start = NULL,
  finish = NULL,
  drinking_only = F,
  data = f) {
  if (type == "a") {
    #this chunk gets the sessions
    t = data.frame(matrix(ncol = 2, nrow = 4)) #create a data frame
    t[, 1] = as.numeric(data[i, paste("session_a", 1:4, sep = "")]) #sessions across the columns
    t[, 2] = do.call("c", lapply(1:4, function(x)
      data[i, paste("sessiondate_a", 1:4, sep = "")][[x]])) #turn into vector
    names(t) = c("intake", "date")
    rownames(t) = paste("session", 1:4, sep = "")

    #this chunk adds in missing days
    y = na.omit(t) #grab the sessions
    if (nrow(y) > 0) {
      sessions = as.numeric(difftime(data$surveydate_a[i],
        min(y$date, na.rm = T), units = "days")) #store how many days data

      t = data.frame(matrix(ncol = 2, nrow = as.numeric(sessions))) #create an empty data frame
      names(t) = c("intake", "date") #name cols
      t$intake = 0 #set all days to 0 intake
      t$date = do.call("c", lapply(1:sessions, function(x)
        as.Date(min(
          y$date, na.rm = T
        )) - 1 + x)) #put in appropriate dates
      for (d in seq_along(y$date)) {
        #for every date in y, put the intake into the right day of t
        t[t$date == y$date[d], "intake"] = y$intake[d]
      }
    }
  } else{
    sessions = 365 #if they didn't put any sessions in, that means they didn't drink for the last year
    t = data.frame(matrix(ncol = 2, nrow = as.numeric(sessions))) #create an empty data frame
    names(t) = c("intake", "date") #name cols
    t$intake = 0 #set all days to 0 intake
    t$date = do.call("c", lapply(1:sessions, function(x)
      as.Date(data$surveydate_a[i] - x)) #put in appropriate dates
    )
  }
}
if (type == "i") {
  t = data.frame(matrix(ncol = 2, nrow = 27)) #create an empty dataframe
```

```

names(t) = c("intake", "date") #with names intake and date
idays = (paste("day", 1:27, sep = "")) #store a vector of the name variables
rownames(t) = idays #put the days in the rownames
t[, 1] = do.call("c", list(t(data[i, idays]))) # grab the day data and throw it in the intake column
t[, 2] = do.call("c", lapply(1:27, function(x)
  as.Date(data$surveydate_i[i] - x)) # put the date in which they occurred under date
t = t[!is.na(t$intake), ] #I don't need those NA rows. get rid of them!
}

if (!is.null(start)) {
  t = t[which(t$date <= start & t$date >= finish), ]
}

if (drinking_only == T) {
  t = t[t$intake != 0, ]
}
return(t)
}

```

## Classify risk function

```

classRisk = function(avg_drinks,max_drinks, cutpoints = c(4,2,10,5)){
  ##short term risk
  s.result = ifelse(max_drinks > cutpoints[1],"high","low")

  ##longterm risk
  l.result = ifelse(avg_drinks > cutpoints[2],"high","low")

  ##short term - severe
  ss.result = ifelse(max_drinks > cutpoints[3],"high","low")

  ##longterm - severe
  ls.result = ifelse(avg_drinks > cutpoints[4],"high","low")
  return(list(short = s.result,long= l.result,short_severe = ss.result,long_severe = ls.result))
}

```

## Set up AUDIT variables

```

audit_levels = c(0,1,2,3,4)
#audit1...
f$audit_1= NA
f$audit_1[f$frequency_audit1_a == 0] = 0
f$audit_1[f$frequency_audit1_a == .5] = 1
f$audit_1[f$frequency_audit1_a == 2] = 2
f$audit_1[f$frequency_audit1_a == 8.69714285714286] = 3
f$audit_1[f$frequency_audit1_a == 23.9171428571429] = 4
f$audit_1 = factor(f$audit_1,audit_levels)
#audit2...
f$audit_2 = NA

```

```

f$audit_2[f$drinker_a == 0] = 0
f$audit_2[f$drinking_intensity_a <= 2] = 0
f$audit_2[f$drinking_intensity_a > 2 & f$drinking_intensity_a <= 4 ] = 1
f$audit_2[f$drinking_intensity_a > 4 & f$drinking_intensity_a <= 6 ] = 2
f$audit_2[f$drinking_intensity_a > 6 & f$drinking_intensity_a <= 9 ] = 3
f$audit_2[f$drinking_intensity_a > 9] = 4
f$audit_2 = factor(f$audit_2,audit_levels)

#audit2_reverse
f$audit_2_reverse = NA
f$audit_2_reverse[as.character(f$audit_2) ==0] = 1.5
f$audit_2_reverse[as.character(f$audit_2) ==1] = 3.5
f$audit_2_reverse[as.character(f$audit_2) ==2] = 5.5
f$audit_2_reverse[as.character(f$audit_2) ==3] = 8
f$audit_2_reverse[as.character(f$audit_2) ==4] = 10

#audit3...
f$audit_3 = NA
f$audit_3[f$drinker_a == 0] = 0
f$audit_3[f$audit3_a == 0] = 0
f$audit_3[f$audit3_a == .5] = 1
f$audit_3[f$audit3_a == 2] = 2
f$audit_3[f$audit3_a == 8.69714285714286] = 3
f$audit_3[f$audit3_a == 23.9171428571429] = 4
f$audit_3 = factor(f$audit_3,audit_levels)

f$audit_c = lapply(f[,c("audit_1","audit_2","audit_3")], function(x){
  as.numeric(as.character(x))
}) %>%
  as.data.frame() %>%
  rowSums()

```

## Classify risk

```

f$audit_risk = ifelse(
  (f$gender_a == "male" & f$audit_c >= 4) |
  (f$gender_a == "female" & f$audit_c >= 3),"high","low"
) %>% factor(levels = c("high","low"))

f$finnish_risk = ifelse(f$short_a == "high" | f$long_a == "high","high","low")%>%
  factor(levels = c("high","low"))

list(table(f$audit_risk),
      table(f$finnish_risk))%>%
  do.call(rbind,.) %>%
  data.frame(row.names = c("audit_c","finnish")) %>%
  knitr::kable(booktabs = T, longtable = F, format = "latex")

```

|         | high | low |
|---------|------|-----|
| audit_c | 177  | 7   |
| finnish | 175  | 9   |

## Converting AUDIT-C responses to continuous variables.

```
##### ###COMPARING AUDIT 1-2 with 3
f$audit1_estimate = (f$frequency_audit1_a * f$audit_2_reverse) / 30.44
f$audit1_estimate[f$drinker_a == 0] = 0
f$audit3_estimate = (f$audit3_a*5)/30.44 #five is the standard drink amount exceeding guidelines

audit_mqr = tibble(audit_c = c("audit_1","audit_2","audit_3"))
audit_mqr$median_iqr = lapply(c("audit1_estimate","audit_2_reverse","audit3_estimate"),function(x){
  f[,x] %>%
  m_iqr}) %>%
  unlist()

audit_mqr %>%
  knitr::kable(booktabs = T, longtable = F, format = "latex")
```

| audit_c | median_iqr  |
|---------|-------------|
| audit_1 | 0.66 (2.12) |
| audit_2 | 10 (0)      |
| audit_3 | 0.33 (0.25) |

Define risk categories for AUDIT-C items. Also create a function to get sens and spec quickly.

```
short1 = ifelse(f$frequency_audit1_a > 1 & f$audit_2_reverse > 4,"high","low")
long1 = ifelse(f$audit1_estimate > 2, "high","low")

short3 = ifelse(f$audit3_a > 1,"high","low")
long3 = ifelse(f$audit3_estimate > 2, "high","low")

short_auditc = ifelse(short3=="high"|short1=="high","high","low")
long_auditc = ifelse(long1=="high" | long3=="high","high","low")
```

## Sensitivity and specificity function

```
get_sens.spec = function(short,long){
  short = factor(short,levels = c("high","low"))
  ss.short = table(short, factor(f$short_a, levels = c("high","low"))) %>%
  epiR::epi.tests()
  ss.long = table(long, factor(f$long_a, levels = c("high","low"))) %>%
  epiR::epi.tests()

  get_se = function(obj){
```

```

results = obj$elements
sens = papertools::glue_bracket(results$se*100,
                                results$se.low*100,
                                results$se.up*100,
                                round = 1)
spec = papertools::glue_bracket(results$sp*100,
                                results$sp.low*100,
                                results$sp.up*100,
                                round = 1)

list(sens = sens, spec = spec)
}

short_sens = ss.short %>% get_se() %>% .$sens
short_spec = ss.short %>% get_se() %>% .$spec

long_sens = ss.long %>% get_se() %>% .$sens
long_spec = ss.long %>% get_se() %>% .$spec

out = cbind(short_sens, short_spec, long_sens, long_spec)
colnames(out) = c("Sens", "Spec", "Sens", "Spec")
rownames(out) = NULL
out
}

```

## Results

### Demographics features of the sample

```

demographic_table = list( # create a list with demographic results
  participants = nrow(f),
  `average age` = papertools::glue_bracket( # put SD in bracket
    mean(f$age_a, na.rm = T),
    sd(f$age_a, na.rm = T),
    brackets = c("(SD = ", ")"),
    round = 2
  ),
  `regional n` = papertools::n_percent(f$remoteness, "Regional"),
  `remote n` = papertools::n_percent(f$remoteness, "Remote"),
  `urban n` = papertools::n_percent(f$remoteness, "Urban"),
  `yr_10 complete` = papertools::n_percent(f$school > 9, "TRUE")
) %>%
  as_tibble %>%
  gather %>%
  rename(variable = key)

demographic_table %>%
  knitr::kable(booktabs = T, longtable = F, format = "latex")

```

| variable       | value              |
|----------------|--------------------|
| participants   | 184                |
| average age    | 37.46 (SD = 13.36) |
| regional n     | 28.00 (15.22%)     |
| remote n       | 66.00 (35.87%)     |
| urban n        | 90.00 (48.91%)     |
| yr_10 complete | 137.00 (74.46%)    |

**Table 1. AUDIT-C item responses and scores for drinkers**

```
table_1 = list(table(f$audit_1), table(f$audit_2), table(f$audit_3))%>%
  lapply(.,function(x) prop.table(x)*100)%>%
  do.call(rbind,.) %>%
  as.data.frame(row.names = c("audit_1","audit_2","audit_3"))%>%
  round(1)
```

```
table_1 %>%
  knitr::kable(booktabs = T, longtable = F, format = "latex")
```

|         | 0    | 1    | 2    | 3    | 4    |
|---------|------|------|------|------|------|
| audit_1 | 0.0  | 30.4 | 42.4 | 26.1 | 1.1  |
| audit_2 | 2.7  | 4.3  | 3.8  | 11.4 | 77.7 |
| audit_3 | 14.1 | 34.2 | 39.1 | 10.3 | 2.2  |

**Table 2. Percent classified at risk based on AUDIT-C, and subsets of AUDIT-C items**

```
short1_table = table(short1) %>% prop.table
long1_table = table(long1) %>% prop.table
short3_table = table(short3) %>% prop.table
long3_table = table(long3) %>% prop.table
short_auditc_table = table(short_auditc) %>% prop.table
long_auditc_table = table(long_auditc) %>% prop.table

short_a_table = table(f$short_a) %>% prop.table
long_a_table = table(f$long_a) %>% prop.table

props = tibble(tool = c("AUDIT1&2", "AUDIT3", "AUDIT-C", "FINNISH"))
props$short = c(short1_table[["high"]],
                short3_table[["high"]],
                short_auditc_table[["high"]],
                short_a_table[["high"]])
props$long = c(long1_table[["high"]], long3_table[["high"]],
               long_auditc_table[["high"]], long_a_table[["high"]])

table2 = apply(props[, 2:3], 2, function(x)
  round(x * 100, 1)) %>% as.data.frame() %>%
  mutate(tool = c("AUDIT1&2", "AUDIT3", "AUDITC", "FINNISH")) %>%
  dplyr::select(" " = tool, short, long)
```

```
table2 %>%
  knitr::kable(booktabs = T,
               longtable = F,
               format = "latex")
```

|          | short | long |
|----------|-------|------|
| AUDIT1&2 | 66.3  | 26.1 |
| AUDIT3   | 51.6  | 2.2  |
| AUDITC   | 70.7  | 26.6 |
| FINNISH  | 95.1  | 44.0 |

## Risk by gender

We use the audit\_C to classify risk, there are different cut-offs for males and females.

females:

```
list(prop.table(table(f$audit_risk[f$gender_a == "female"])),
     prop.table(table(f$finnish_risk[f$gender_a == "female"])))%>%
  do.call(rbind,.) %>%
  data.frame(row.names = c("audit_c", "finnish")) %>%
  knitr::kable(booktabs = T, longtable = F, format = "latex")
```

|         | high      | low       |
|---------|-----------|-----------|
| audit_c | 0.9615385 | 0.0384615 |
| finnish | 0.9230769 | 0.0769231 |

males:

```
list(prop.table(table(f$audit_risk[f$gender_a == "male"])),
     prop.table(table(f$finnish_risk[f$gender_a == "male"])))%>%
  do.call(rbind,.) %>%
  data.frame(row.names = c("audit_c", "finnish")) %>%
  knitr::kable(booktabs = T, longtable = F, format = "latex")
```

|         | high      | low       |
|---------|-----------|-----------|
| audit_c | 0.9622642 | 0.0377358 |
| finnish | 0.9716981 | 0.0283019 |

## Sensitivity and specificity of AUDIT vs Finnish Method risk (any risk)

```
sens__spec_results = table(f$audit_risk, f$finnish_risk) %>%
  epiR::epi.tests() %>%
  .$elements

data.frame(Sensitivity = papertools::glue_bracket(sens__spec_results$se*100,
                                                sens__spec_results$se.low*100,
                                                sens__spec_results$se.up*100,
                                                round = 1),
           Specificity = papertools::glue_bracket(sens__spec_results$sp*100,
                                                sens__spec_results$sp.low*100,
                                                sens__spec_results$sp.up*100,
```



```
round = 1)) %>%
knitr::kable(booktabs = T, longtable = F, format = "latex")
```

| Sensitivity        | Specificity       |
|--------------------|-------------------|
| 99.4 (96.9, 100.0) | 66.7 (29.9, 92.5) |

**Table 3. Comparing AUDIT-C and its item subsets against the Finnish method**

```
table_3 = list(
  get_sens.spec(short1,long1),
  get_sens.spec(short3,long3),
  get_sens.spec(short_auditc,long_auditc)) %>%
do.call(rbind,.) %>%
data.frame()
rownames(table_3) = c("AUDIT-1m and AUDIT-2m", "AUDIT-3mv", "AUDIT-c")
names(table_3) = c("short sensitivity","short specificity","long sensitivity","long specificity")

table_3 %>%
knitr::kable(booktabs = T, longtable = F, format = "latex")
```

|                       | short sensitivity | short specificity   | long sensitivity  | long specificity   |
|-----------------------|-------------------|---------------------|-------------------|--------------------|
| AUDIT-1m and AUDIT-2m | 69.7 (62.3, 76.4) | 100.0 (66.4, 100.0) | 46.9 (35.7, 58.3) | 90.3 (82.9, 95.2)  |
| AUDIT-3mv             | 53.7 (46.0, 61.3) | 88.9 (51.8, 99.7)   | 3.7 (0.8, 10.4)   | 99.0 (94.7, 100.0) |
| AUDIT-c               | 73.7 (66.5, 80.1) | 88.9 (51.8, 99.7)   | 48.1 (36.9, 59.5) | 90.3 (82.9, 95.2)  |

### Function for shortening Finnish method

```
shorten = function(n_session, n_freq, data = f){
require(lubridate)
max = c()
intensity = c()
average = c()
frequency = c()
short = c()
long = c()
short_severe = c()
long_severe = c()
n_sessions = c()

for(i in seq_along(data[,1])){
  #print(i)
  pad = 0
  sessions = getSessions(i,"a",drinking_only = T,data = data)
  sessions$date = as_date(sessions$date)
  inten.sessions = sessions[1:n_session,]$intake
  freq.sessions = as.Date(sessions[1:n_freq,]$date)

  if(all(is.na(freq.sessions))){
    freq.sessions = c()
  }else{
```

```

    freq.sessions = na.omit(freq.sessions)
  }
  intensity[i] = mean(inten.sessions,na.rm=T)
  n = length(freq.sessions)
  total = intensity[i] * n
  if(n > 0){
    duration = as.numeric(difftime(data$surveydate_a[i],min(freq.sessions), units = "days"))
    pad = (duration / n) * .5
    duration = duration + pad
  } else{
    duration = NA
  }
  n_sessions[i] = n
  average[i] = total/duration
  max[i] = max(inten.sessions,na.rm=T)
  frequency[i] = n/duration
}
max[is.infinite(max)] = NA
average[is.infinite(average)] = NA
frequency[is.infinite(frequency)] = NA
max[data$drinker_a == 0] = 0
average[data$drinker_a == 0] = 0

#Class Risks
for(i in seq_along(max)){
  risk = classRisk(average[i],max[i])
  short[i]<- risk$short
  long[i] <-risk$long
  short_severe[i] <- risk$short_severe
  long_severe[i] <- risk$long_severe
}

return(data.frame(list(n_sessions = n_sessions,max = max, intensity = intensity,
  average = average, frequency = frequency,
  short = short , long = long , short_severe = short_severe , long_severe = long_severe)))
}
#

```

**Table 4. The total variance explained by shorter versions of the Finnish method in comparison to the full Finnish method**

```

table4 = data.frame(matrix(nrow = 4, ncol = 4))
rownames(table4) = paste0("intensity_", 1:4)
names(table4) = paste0("freq_", 1:4)
for (c in seq_along(names(table4))) {
  for (r in seq_along(rownames(table4))) {
    #print(r)
    table4[r, c] = cor.test(f$averageintake_a,
      shorten(r, c, data = f)$average,
      method = "pearson")$estimate
  }
}

```

```

}
}
table4 = round(table4 ^ 2, 3) * 100
table4 %>%
  knitr::kable(booktabs = T,
               longtable = F,
               format = "latex")

```

|             | freq_1 | freq_2 | freq_3 | freq_4 |
|-------------|--------|--------|--------|--------|
| intensity_1 | 95.9   | 95.9   | 96.1   | 96.6   |
| intensity_2 | 98.6   | 98.6   | 98.8   | 99.7   |
| intensity_3 | 98.6   | 98.6   | 98.8   | 99.6   |
| intensity_4 | 98.8   | 98.8   | 99.0   | 100.0  |

**Table 4b.** the total variance explained by shorter versions of the Finnish method in comparison to the full Finnish method - excluding cases with no variance between drinking occasions

In order to excluded cases of lazy reporting we repeated the analysis with cases of no variance excluded.

```

table4b = data.frame(matrix(nrow = 4, ncol = 4))
rownames(table4b) = paste0("intensity_", 1:4)
names(table4b) = paste0("freq_", 1:4)
for (c in seq_along(names(table4b))) {
  for (r in seq_along(rownames(table4b))) {
    #print(r)
    table4b[r, c] = cor.test(tr$averageintake_a,
                           shorten(r, c, data = tr)$average,
                           method = "pearson")$estimate
  }
}
table4b = round(table4b ^ 2, 3) * 100
table4b %>%
  knitr::kable(booktabs = T,
               longtable = F,
               format = "latex")

```

|             | freq_1 | freq_2 | freq_3 | freq_4 |
|-------------|--------|--------|--------|--------|
| intensity_1 | 97.9   | 97.9   | 98.3   | 100    |
| intensity_2 | 97.9   | 97.9   | 98.3   | 100    |
| intensity_3 | 97.9   | 97.9   | 98.3   | 100    |
| intensity_4 | 97.9   | 97.9   | 98.3   | 100    |
